# Supplementary material
Source: publisher figshare collection journal article supplement (https://sage.figshare.com/ndownloader/files/14413169)
Supplement: Supplementary file 1 [file 14413169]

## **Appendix**

### **The downward spiral of youth unemployment: An approach considering social networks and family background**

#### **Mireia Bolibar**

Grup de Recerca en Desigualtats en Salut – Employment Conditions Knowledge Network (GREDS-EMCONET), JHU-UPF Public Policy Center, Department of Political and Social Sciences, Universitat Pompeu Fabra, Spain.

#### **Joan Miquel Verd**

Centre d'Estudis Sociològics sobre la Vida Quotidiana i el Treball (Sociological Research Centre on Everyday Life and Work - QUIT), Institut d'Estudis del Treball (Institute for Labour Studies - IET), Universitat Autònoma de Barcelona, Spain.

#### **Oriol Barranco**

Centre d'Estudis Sociològics sobre la Vida Quotidiana i el Treball (Sociological Research Centre on Everyday Life and Work - QUIT), Institut d'Estudis del Treball (Institute for Labour Studies - IET), Universitat Autònoma de Barcelona, Spain.

## Appendix 1: Questionnaire

### Name generator

*Please write down a list of 20 people that you know by name and vice versa with whom you have had contact at least in the last two years by any means of communication, and whom you could be able to contact again if necessary or advisable. Do not include people younger than 18 years old. It can be anyone. Try to write down first the people who are close and very important to you. Second, write down the people who have already been mentioned during the interview because they have helped you in your career, as well as other people not mentioned who have helped or provided support with information and help to get a job (whether they are close or distant from you). Finally, write down any other people you tend to see often, even if they are not very close or helpful. You can also include other people. It might be helpful for you to think of different groups of people in different places (family, friends, colleagues, neighbours, etc.). Write down the first name or full name so that only you can recognize these people but you will be able to recognize them later on. For instance: “Mig Cervan” for “Miguel de Cervantes”.*

This name generator gathered a fixed-number list of 20 contacts, including three types of contacts: (i) all important intimate contacts; (ii) all contacts who were helpful or supportive in any way in the job seeking process; (iii) any other contacts who were not so close as the first ones or as useful or supportive as the second ones, but who were met often. This category was included in order to reach the fixed number of 20 reported contacts in total, which guaranteed that the number of contacts mentioned in the two previous categories was not biased by fatigue or desirability effects. However, only those who helped the interviewee look for jobs were included in the analysis (even if their assistance did not lead to actually finding a job). The fact that just before this question

the questionnaire had explored all the employment events of the trajectory and the strategies applied to find them helped the people to recall who had helped in the job seeking process.

In order to ensure the quality of the responses on the characteristics of these contacts, the list included only names of people with whom the interviewee had been in touch in the last two years. As a result, contacts who had helped the interviewee to find a job in the past but with whom he or she had not had contact in the last two years were excluded from the list. In Tables A1 and A5, when the main focus is on the past events and not on the present network, they are referred to as “old unknown contacts”.

## Appendix 2: Additional tables

**Table A1: Summary statistics for study variables:**

| <b>Interviewee characteristics (%) (N=250)</b>                                                                                                                       |                                                            |             |
|----------------------------------------------------------------------------------------------------------------------------------------------------------------------|------------------------------------------------------------|-------------|
| Education                                                                                                                                                            | Primary education                                          | 25.2 %      |
|                                                                                                                                                                      | Secondary education                                        | 26.8 %      |
|                                                                                                                                                                      | Higher education                                           | 48.0 %      |
| Age                                                                                                                                                                  | 20-24                                                      | 22.8 %      |
|                                                                                                                                                                      | 25-29                                                      | 34.0 %      |
|                                                                                                                                                                      | 30-34                                                      | 43.2 %      |
| Place of residence                                                                                                                                                   | Barcelona                                                  | 49.2 %      |
|                                                                                                                                                                      | Other municipalities of the Metropolitan Area of Barcelona | 50.8 %      |
| Origin                                                                                                                                                               | Born in Spain                                              | 87.2 %      |
|                                                                                                                                                                      | Born abroad                                                | 12.8 %      |
| Sex                                                                                                                                                                  | Female                                                     | 52.0 %      |
|                                                                                                                                                                      | Male                                                       | 48.0 %      |
| Main situation of activity (at the time of the interview)                                                                                                            | Studying                                                   | 20.4 %      |
|                                                                                                                                                                      | Employed                                                   | 55.2 %      |
|                                                                                                                                                                      | Unemployed                                                 | 22.4 %      |
|                                                                                                                                                                      | Others                                                     | 2.0 %       |
| Family SES background                                                                                                                                                | High                                                       | 25.8 %      |
|                                                                                                                                                                      | Middle                                                     | 31.0 %      |
|                                                                                                                                                                      | Low                                                        | 43.1 %      |
| <b>Network characteristics</b> of the sub-set of contacts who had helped the interviewees to look for jobs (Mean number of contacts and standard deviation) (N=250): |                                                            |             |
| Overall number                                                                                                                                                       |                                                            | 9.34(4.63)  |
| Sociability sphere: Family                                                                                                                                           |                                                            | 2.75(2.01)  |
| Sociability sphere: Employment                                                                                                                                       |                                                            | 1.81(2.01)  |
| Sociability sphere: Education                                                                                                                                        |                                                            | 2.0(2.42)   |
| Sociability sphere: Other                                                                                                                                            |                                                            | 2.75(2.46)  |
| Employed contacts                                                                                                                                                    |                                                            | 7.4(3.93)   |
| Unemployed contacts                                                                                                                                                  |                                                            | 0.67(1.09)  |
| Contacts of low SES                                                                                                                                                  |                                                            | 4.48(3.59)  |
| Contacts of middle or high SES                                                                                                                                       |                                                            | 4.224(3.26) |
| Weak ties (“not close at all”)                                                                                                                                       |                                                            | 1.38(1.49)  |
| Strong ties (“intimate” and “close”)                                                                                                                                 |                                                            | 7.94(4.08)  |
| Contacts who had actually helped to find a job                                                                                                                       |                                                            | 2.56(2.10)  |
| <b>Events characteristics (%) (N=1734)</b>                                                                                                                           |                                                            |             |
| Type of event                                                                                                                                                        | Education                                                  | 17.3 %      |
|                                                                                                                                                                      | Employment                                                 | 65.1 %      |
|                                                                                                                                                                      | Unemployment                                               | 14.2 %      |
|                                                                                                                                                                      | Others                                                     | 3.5 %       |
| Mechanism used for finding employment events                                                                                                                         | Family contacts                                            | 14.5 %      |
|                                                                                                                                                                      | Employment contacts                                        | 8.1 %       |
|                                                                                                                                                                      | Educational contacts                                       | 6.3 %       |
|                                                                                                                                                                      | Other contacts                                             | 9.3 %       |
|                                                                                                                                                                      | Old unknown contacts                                       | 24.9 %      |
|                                                                                                                                                                      | Formal mechanism                                           | 19.2 %      |
| Mechanism used for finding the first job                                                                                                                             | Self-application                                           | 17.7 %      |
|                                                                                                                                                                      | Family contacts                                            | 26.5 %      |
|                                                                                                                                                                      | Non-family contacts                                        | 42.4 %      |
|                                                                                                                                                                      | Other mechanisms (formal & self-application)               | 31.1 %      |

**Table A1: Summary statistics for study variables (continuation)**

**Characteristics of the trajectory during the recession** (from October 2007 to March 2014)  
(N=250):

|                                                                                                      |                                                                                                                   |              |
|------------------------------------------------------------------------------------------------------|-------------------------------------------------------------------------------------------------------------------|--------------|
| Labour market status<br>(mean number of months in the<br>following states and standard<br>deviation) | Studying                                                                                                          | 27.59(28.45) |
|                                                                                                      | Unstable employment (temporary contracts,<br>internships, working without contract or in<br>short odd jobs)       | 20.93(23.29) |
|                                                                                                      | Stable employment (open-ended contracts or<br>non-salaried employment)                                            | 16.10(25.49) |
|                                                                                                      | Unemployed                                                                                                        | 9.77(16.25)  |
| Experience of unemployment<br>during the crisis                                                      | Never unemployed or unemployed less than<br>12 months                                                             | 72.0%        |
|                                                                                                      | Events of unemployment, short (<12 months)<br>or long ( $\geq 12$ months), that total between 12<br>and 24 months | 14.4%        |
|                                                                                                      | Long events of unemployment ( $\geq 12$ months)<br>that total 24 months or more                                   | 13.6%        |

---

**Table A2: Additional information for Table 2: Multinomial logistic regression analysis testing the factors associated with using networks to find the first job. Baseline category: using formal mechanisms or self-application (N=250).**

|                                                |                                                                       | B     | SE    | Sig. | Exp(B) |
|------------------------------------------------|-----------------------------------------------------------------------|-------|-------|------|--------|
| First job obtained through family networks     | Intercept                                                             | 5.604 | 1.785 | **   |        |
|                                                | Age at the start of the first job                                     | -.349 | .105  | **   | .705   |
|                                                | Low family SES background (vs. middle and high family SES background) | -.739 | .367  | *    | .478   |
|                                                | Sex: male (vs. female)                                                | .585  | .361  |      | 1.795  |
|                                                | Event started during the crisis (vs. event started before 2008)       | 1.419 | .454  | **   | 4.133  |
|                                                | Origin: born abroad (v. born in Spain)                                | .266  | .578  |      | 1.305  |
| First job obtained through non-family networks | Intercept                                                             | 4.361 | 1.499 | **   |        |
|                                                | Age at the start of the first job                                     | -.219 | .086  | *    | .803   |
|                                                | Low family SES background (vs. middle and high family SES background) | -.257 | .312  |      | .774   |
|                                                | Sex: male (vs. female)                                                | -.430 | .314  |      | .651   |
|                                                | Event started during the crisis (vs. event started before 2008)       | .360  | .441  |      | 1.433  |
|                                                | Origin: born abroad (v. born in Spain)                                | .319  | .488  |      | 1.375  |

R2 Nagelkerke : 0.149\*\*

Significance level: \*\*0.01 \*0.05

**Table A3a: Additional information for Table 3: Odds Ratios and 95% Confidence Intervals (between brackets) of binary multilevel regression models showing the association of the interviewee's sex, origin, age, level of education and the sphere where contacts were met with the employment status (employed) of the contacts (N=250 interviewees, N=2336 contacts who had helped look for jobs).**

|                                       |                                                                     |        |                    |                     |
|---------------------------------------|---------------------------------------------------------------------|--------|--------------------|---------------------|
| Middle and high family SES background | Random effects:                                                     |        |                    |                     |
|                                       | Interviewee variance                                                | 0.532  | 0.439              | 0.330               |
|                                       | Fixed effects:                                                      |        |                    |                     |
|                                       | Contact sociability sphere: employment (vs. family)                 |        | 2.680(1.58-4.53)** | 2.631(1.55-4.46)**  |
|                                       | Contact sociability sphere: education (vs. family)                  |        | 0.869(0.58-1.30)   | 0.874(0.59-1.31)    |
|                                       | Contact sociability sphere: other (vs. family)                      |        | 1.083(0.73-1.62)   | 1.078(0.72-1.61)    |
|                                       | Interviewee sex: male (vs. female)                                  |        |                    | 0.985(0.66-1.47)    |
|                                       | Interviewee origin: born abroad (vs. born in Spain)                 |        |                    | 1.086(0.63-1.88)    |
|                                       | Interviewee age: 25-29 (vs. 20-24)                                  |        |                    | 1.707(1.00-2.91)**  |
|                                       | Interviewee age: 30-34 (vs. 20-24)                                  |        |                    | 1.176(0.68-2.04)    |
|                                       | Interviewee education: higher (vs. primary and secondary education) |        |                    | 1.438(0.94-2.21)    |
|                                       | AIC                                                                 | 1165.9 | 1148.8             | 1149.4              |
|                                       | BIC                                                                 | 1176.1 | 1174.4             | 1200.5              |
|                                       | ICC                                                                 | 0.139  | 11.800             | 9.100               |
| Low family SES background             | Random effects:                                                     |        |                    |                     |
|                                       | Interviewee variance                                                | 0.435  | 0.409              | 0.405               |
|                                       | Fixed effects:                                                      |        |                    |                     |
|                                       | Contact sociability sphere: employment (vs. family)                 |        | 4.087(2.29-7.28)** | 4.094(2.29-7.332)** |
|                                       | Contact sociability sphere: education (vs. family)                  |        | 1.495(0.95-2.36)   | 1.471(0.93-2.33)    |
|                                       | Contact sociability sphere: other (vs. family)                      |        | 1.394(0.96-2.03)   | 1.403(0.96-2.05)    |
|                                       | Interviewee sex: male (vs. female)                                  |        |                    | 1.158(0.75-1.78)    |
|                                       | Interviewee origin: born abroad (vs. born in Spain)                 |        |                    | 1.188(0.66-2.13)    |
|                                       | Interviewee age: 25-29 (vs. 20-24)                                  |        |                    | 1.032(0.60-1.78)    |
|                                       | Interviewee age: 30-34 (vs. 20-24)                                  |        |                    | 1.063(0.63-1.79)    |
|                                       | Interviewee education: higher (vs. primary and secondary education) |        |                    | 1.260(0.79-2.01)    |
|                                       | AIC                                                                 | 1069.3 | 1045.5             | 1054.1              |
|                                       | BIC                                                                 | 1079.1 | 1070.1             | 1103.2              |
|                                       | ICC                                                                 | 0.117  | 0.111              | 0.110               |

Significance level: \*\*0.01 \*0.05

**Table A3b: Additional information for Table 3: Odds Ratios and 95% Confidence Intervals (between brackets) of binary multilevel regression models showing the association of the interviewee's sex, origin, age, level of education and the sphere where contacts were met with the employment status (unemployed) of the contacts (N=250 interviewees, N=2336 contacts who had helped look for jobs).**

|                                       |                                                                     |       |                   |                   |
|---------------------------------------|---------------------------------------------------------------------|-------|-------------------|-------------------|
| Middle and high family SES background | Random effects:                                                     |       |                   |                   |
|                                       | Interviewee variance                                                | 0.438 | 0.380             | 0.039             |
|                                       | Fixed effects:                                                      |       |                   |                   |
|                                       | Contact sociability sphere: employment (vs. family)                 |       | 1.380(0.53-3.58)  | 1.384(0.53-3.58)  |
|                                       | Contact sociability sphere: education (vs. family)                  |       | 2.389(1.04-5.49)* | 2.442(1.07-5.59)* |
|                                       | Contact sociability sphere: other (vs. family)                      |       | 2.554(1.14-5.74)* | 2.365(1.06-5.28)* |
|                                       | Interviewee sex: male (vs. female)                                  |       |                   | 0.799(0.45-1.43)  |
|                                       | Interviewee origin: born abroad (vs. born in Spain)                 |       |                   | 1.802(0.74-3.47)  |
|                                       | Interviewee age: 25-29 (vs. 20-24)                                  |       |                   | 2.237(0.86-5.80)  |
|                                       | Interviewee age: 30-34 (vs. 20-24)                                  |       |                   | 3.090(1.17-8.19)* |
|                                       | Interviewee education: higher (vs. primary and secondary education) |       |                   | 0.757(0.41-1.41)  |
|                                       | AIC                                                                 | 463.9 | 462.3             | 463.8             |
|                                       | BIC                                                                 | 474.1 | 487.9             | 515               |
|                                       | ICC                                                                 | 0.117 | 10.300            | 1.200             |
| Low family SES background             | Random effects:                                                     |       |                   |                   |
|                                       | Interviewee variance                                                | 0.621 | 0.591             | 0.549             |
|                                       | Fixed effects:                                                      |       |                   |                   |
|                                       | Contact sociability sphere: employment (vs. family)                 |       | 0.360(0.16-0.82)* | 0.354(0.16-0.81)* |
|                                       | Contact sociability sphere: education (vs. family)                  |       | 1.029(0.56-1.88)  | 1.078(0.58-1.99)  |
|                                       | Contact sociability sphere: other (vs. family)                      |       | 0.933(0.56-1.57)  | 0.908(0.54-1.53)  |
|                                       | Interviewee sex: male (vs. female)                                  |       |                   | 0.838(0.48-1.48)  |
|                                       | Interviewee origin: born abroad (vs. born in Spain)                 |       |                   | 0.914(0.43-1.94)  |
|                                       | Interviewee age: 25-29 (vs. 20-24)                                  |       |                   | 1.075(0.52-2.22)  |
|                                       | Interviewee age: 30-34 (vs. 20-24)                                  |       |                   | 1.122(0.57-2.22)  |
|                                       | Interviewee education: higher (vs. primary and secondary education) |       |                   | 0.609(0.32-1.15)  |
|                                       | AIC                                                                 | 660.5 | 657.1             | 664.6             |
|                                       | BIC                                                                 | 670.3 | 681.6             | 713.7             |
|                                       | ICC                                                                 | 0.159 | 15.200            | 14.300            |

Significance level: \*\*0.01 \*0.05



**Table A3c: Additional information for Table 3: Odds Ratios and 95% Confidence Intervals (between brackets) of binary multilevel regression showing the association of the interviewee's sex, origin, age, level of education and the sphere where contacts were met with the SES (middle or high) of the contacts (N=250 interviewees, N=2336 contacts who had helped look for jobs).**

|                                       |                                                                     |        |                    |                    |
|---------------------------------------|---------------------------------------------------------------------|--------|--------------------|--------------------|
| Middle and high family SES background | Random effects:                                                     |        |                    |                    |
|                                       | Interviewee variance                                                | 1.313  | 1.388              | 1.003              |
|                                       | Fixed effects:                                                      |        |                    |                    |
|                                       | Contact sociability sphere: employment (vs. family)                 |        | 0.487(0.32-0.74)** | 0.460(0.30-0.70)** |
|                                       | Contact sociability sphere: education (vs. family)                  |        | 0.388(0.26-0.58)** | 0.371(0.25-0.56)** |
|                                       | Contact sociability sphere: other (vs. family)                      |        | 0.342(0.23-0.51)** | 0.337(0.23-0.50)** |
|                                       | Interviewee sex: male (vs. female)                                  |        |                    | 1.130(0.70-1.81)   |
|                                       | Interviewee origin: born abroad (vs. born in Spain)                 |        |                    | 0.631(0.32-1.26)   |
|                                       | Interviewee age: 25-29 (vs. 20-24)                                  |        |                    | 0.898(0.47-1.71)   |
|                                       | Interviewee age: 30-34 (vs. 20-24)                                  |        |                    | 1.187(0.60-2.34)   |
|                                       | Interviewee education: higher (vs. primary and secondary education) |        |                    | 3.136(1.88-5.24)** |
|                                       | AIC                                                                 | 1458.8 | 1428               | 1410               |
|                                       | BIC                                                                 | 1469   | 1453.3             | 1460.6             |
|                                       | ICC                                                                 | 0.285  | 29.700             | 23.400             |
| Low family SES background             | Random effects:                                                     |        |                    |                    |
|                                       | Interviewee variance                                                | 0.825  | 0.699              | 0.499              |
|                                       | Fixed effects:                                                      |        |                    |                    |
|                                       | Contact sociability sphere: employment (vs. family)                 |        | 3.117(1.98-4.90)** | 3.028(1.93-4.75)** |
|                                       | Contact sociability sphere: education (vs. family)                  |        | 2.951(1.87-4.67)** | 2.851(1.80-4.51)** |
|                                       | Contact sociability sphere: other (vs. family)                      |        | 1.282(0.86-1.92)   | 1.292(0.86-1.93)   |
|                                       | Interviewee sex: male (vs. female)                                  |        |                    | 0.819(0.53-1.27)   |
|                                       | Interviewee origin: born abroad (vs. born in Spain)                 |        |                    | 0.619(0.33-1.15)   |
|                                       | Interviewee age: 25-29 (vs. 20-24)                                  |        |                    | 1.369(0.77-2.43)   |
|                                       | Interviewee age: 30-34 (vs. 20-24)                                  |        |                    | 1.245(1.19-3.02)   |
|                                       | Interviewee education: higher (vs. primary and secondary education) |        |                    | 1.896(1.19-3.02)** |
|                                       | AIC                                                                 | 1168.2 | 1125.3             | 1118.7             |
|                                       | BIC                                                                 | 1177.9 | 1149.4             | 1166.9             |
|                                       | ICC                                                                 | 0.200  | 17.500             | 13.200             |

Significance level: \*\*0.01 \*0.05

**Table A4a: Additional information for Table 4. Linear regression analysis showing the association of long-term unemployment during the recession with the number of contacts who had helped to look for jobs who were met in the employment sphere, segmented according to the interviewees' family SES background (N=250 interviewees):**

|                                       |                                                                                                                                                               | B      | SE    | Beta   | Sig. | TOL   | B      | SE    | Beta   | Sig. | TOL   |
|---------------------------------------|---------------------------------------------------------------------------------------------------------------------------------------------------------------|--------|-------|--------|------|-------|--------|-------|--------|------|-------|
| Middle and high family SES background | Intercept                                                                                                                                                     | 0.945  | 0.408 |        | *    |       | 0.617  | 0.426 |        |      |       |
|                                       | Length of trajectory in years                                                                                                                                 | 0.025  | 0.044 | 0.050  |      | 0.750 | 0.009  | 0.047 | 0.019  |      | 0.635 |
|                                       | Number of jobs                                                                                                                                                | 0.283  | 0.063 | 0.411  | **   | 0.699 | 0.273  | 0.063 | 0.397  | **   | 0.671 |
|                                       | Events of unemployment, short (<12 months) or long (>=12months), that total between 12 and 24 months (vs. never unemployed or unemployed less than 12 months) | -1.196 | 0.534 | -0.183 | *    | 0.884 | -0.969 | 0.533 | -0.149 |      | 0.852 |
|                                       | Long events of unemployment (>=12 months) that total 24 months or more (vs. never unemployed or unemployed less than 12 months)                               | -2.340 | 0.775 | -0.240 | **   | 0.944 | -2.395 | 0.773 | -0.245 | **   | 0.912 |
|                                       | Education: higher (vs. primary and secondary)                                                                                                                 |        |       |        |      |       | 0.285  | 0.357 | 0.067  |      | 0.812 |
|                                       | Sex: male (vs. female)                                                                                                                                        |        |       |        |      |       | 0.859  | 0.328 | 0.202  | **   | 0.958 |
|                                       | Origin: born abroad (vs. born in Spain)                                                                                                                       |        |       |        |      |       | -0.387 | 0.494 | -0.059 |      | 0.991 |
|                                       | R2                                                                                                                                                            |        | 0.192 |        | **   |       |        | 0.241 |        | **   |       |
| Low family SES background             | Intercept                                                                                                                                                     | 0.827  | 0.507 |        |      |       | 0.949  | 0.568 |        |      |       |
|                                       | Length of trajectory in years                                                                                                                                 | 0.115  | 0.051 | 0.254  | *    | 0.678 | 0.096  | 0.054 | 0.212  |      | 0.611 |
|                                       | Number of jobs                                                                                                                                                | -0.026 | 0.067 | -0.046 |      | 0.646 | 0.003  | 0.073 | 0.004  |      | 0.551 |
|                                       | Events of unemployment, short (<12 months) or long (>=12months), that total between 12 and 24 months (vs. never unemployed or unemployed less than 12 months) | 0.370  | 0.485 | 0.076  |      | 0.863 | 0.341  | 0.491 | 0.071  |      | 0.853 |
|                                       | Long events of unemployment (>=12 months) that total 24 months or more (vs. never unemployed or unemployed less than 12 months)                               | -1.014 | 0.426 | -0.235 | *    | 0.888 | -0.911 | 0.451 | -0.211 | *    | 0.802 |
|                                       | Education: higher (vs. primary and secondary)                                                                                                                 |        |       |        |      |       | 0.233  | 0.485 | 0.053  |      | 0.734 |
|                                       | Sex: male (vs. female)                                                                                                                                        |        |       |        |      |       | -0.071 | 0.373 | -0.019 |      | 0.869 |
|                                       | Origin: born abroad (vs. born in Spain)                                                                                                                       |        |       |        |      |       | -0.591 | 0.536 | -0.108 |      | 0.920 |
|                                       | R2                                                                                                                                                            |        | 0.124 |        | **   |       |        | 0.139 |        | *    |       |

Significance level: \*\*0.01 \*0.05

**Table A4b: Additional information for Table 4. Linear regression analysis showing the association of long-term unemployment during the recession with the number of contacts who had helped to look for jobs who were employed, segmented according to the interviewees' family SES background (N=250 interviewees):**

|                                       |                                                                                                                                                               | B      | SE    | Beta   | Sig. | TOL   | B      | SE    | Beta   | Sig. | TOL   |
|---------------------------------------|---------------------------------------------------------------------------------------------------------------------------------------------------------------|--------|-------|--------|------|-------|--------|-------|--------|------|-------|
| Middle and high family SES background | Intercept                                                                                                                                                     | 7.416  | 0.852 |        | **   |       | 6.412  | 0.882 |        | **   |       |
|                                       | Length of trajectory in years                                                                                                                                 | -0.111 | 0.091 | -0.118 |      | 0.750 | -0.155 | 0.096 | -0.164 |      | 0.635 |
|                                       | Number of jobs                                                                                                                                                | 0.316  | 0.132 | 0.240  | *    | 0.699 | 0.303  | 0.131 | 0.230  | *    | 0.671 |
|                                       | Events of unemployment, short (<12 months) or long (>=12months), that total between 12 and 24 months (vs. never unemployed or unemployed less than 12 months) | -0.558 | 1.115 | -0.045 |      | 0.884 | -0.037 | 1.103 | -0.003 |      | 0.852 |
|                                       | Long events of unemployment (>=12 months) that total 24 months or more (vs. never unemployed or unemployed less than 12 months)                               | -0.761 | 1.618 | -0.041 |      | 0.944 | -0.851 | 1.599 | -0.045 |      | 0.912 |
|                                       | Education: higher (vs. primary and secondary)                                                                                                                 |        |       |        |      |       | 0.812  | 0.738 | 0.100  |      | 0.812 |
|                                       | Sex: male (vs. female)                                                                                                                                        |        |       |        |      |       | 1.738  | 0.679 | 0.213  | *    | 0.958 |
|                                       | Origin: born abroad (vs. born in Spain)                                                                                                                       |        |       |        |      |       | 1.824  | 1.023 | 0.146  |      | 0.991 |
|                                       | R2                                                                                                                                                            |        | 0.041 |        |      |       |        | 0.116 |        | *    |       |
| Low family SES background             | Intercept                                                                                                                                                     | 8.432  | 1.057 |        | **   |       | 7.654  | 1.180 |        | **   |       |
|                                       | Length of trajectory in years                                                                                                                                 | -0.076 | 0.107 | -0.082 |      | 0.678 | -0.072 | 0.113 | -0.079 |      | 0.611 |
|                                       | Number of jobs                                                                                                                                                | 0.104  | 0.139 | 0.090  |      | 0.646 | 0.115  | 0.151 | 0.099  |      | 0.551 |
|                                       | Events of unemployment, short (<12 months) or long (>=12months), that total between 12 and 24 months (vs. never unemployed or unemployed less than 12 months) | 0.273  | 1.010 | 0.028  |      | 0.863 | 0.312  | 1.020 | 0.032  |      | 0.853 |
|                                       | Long events of unemployment (>=12 months) that total 24 months or more (vs. never unemployed or unemployed less than 12 months)                               | -2.244 | 0.888 | -0.257 | *    | 0.888 | -2.208 | 0.937 | -0.253 | *    | 0.802 |
|                                       | Education: higher (vs. primary and secondary)                                                                                                                 |        |       |        |      |       | 0.964  | 1.007 | 0.107  |      | 0.734 |
|                                       | Sex: male (vs. female)                                                                                                                                        |        |       |        |      |       | 0.605  | 0.775 | 0.081  |      | 0.869 |
|                                       | Origin: born abroad (vs. born in Spain)                                                                                                                       |        |       |        |      |       | 1.238  | 1.112 | 0.112  |      | 0.920 |
|                                       | R2                                                                                                                                                            |        | 0.073 |        |      |       |        | 0.094 |        |      |       |

Significance level: \*\*0.01 \*0.05

**Table A4c: Additional information for Table 4. Linear regression analysis showing the association of long-term unemployment during the recession with the number of contacts who had helped to look for jobs who had middle or high SES, segmented according to the interviewees' family SES background (N=250 interviewees):**

|                                       |                                                                                                                                                               | B      | SE    | Beta   | Sig. | TOL   | B      | SE    | Beta   | Sig. | TOL   |
|---------------------------------------|---------------------------------------------------------------------------------------------------------------------------------------------------------------|--------|-------|--------|------|-------|--------|-------|--------|------|-------|
| Middle and high family SES background | Intercept                                                                                                                                                     | 4.002  | 0.743 |        | **   |       | 3.231  | 0.755 |        | **   |       |
|                                       | Length of trajectory in years                                                                                                                                 | 0.073  | 0.080 | 0.089  |      | 0.750 | -0.031 | 0.083 | -0.037 |      | 0.635 |
|                                       | Number of jobs                                                                                                                                                | 0.149  | 0.116 | 0.130  |      | 0.699 | 0.178  | 0.112 | 0.155  |      | 0.671 |
|                                       | Events of unemployment, short (<12 months) or long (>=12months), that total between 12 and 24 months (vs. never unemployed or unemployed less than 12 months) | -1.444 | 0.973 | -0.133 |      | 0.884 | -0.712 | 0.945 | -0.065 |      | 0.852 |
|                                       | Long events of unemployment (>=12 months) that total 24 months or more (vs. never unemployed or unemployed less than 12 months)                               | -1.328 | 1.411 | -0.081 |      | 0.944 | -0.893 | 1.369 | -0.055 |      | 0.912 |
|                                       | Education: higher (vs. primary and secondary)                                                                                                                 |        |       |        |      |       | 1.999  | 0.632 | 0.282  | **   | 0.812 |
|                                       | Sex: male (vs. female)                                                                                                                                        |        |       |        |      |       | 1.318  | 0.581 | 0.186  | *    | 0.958 |
|                                       | Origin: born abroad (vs. born in Spain)                                                                                                                       |        |       |        |      |       | 0.295  | 0.876 | 0.027  |      | 0.991 |
|                                       | R2                                                                                                                                                            |        | 0.038 |        |      |       |        | 0.145 |        | **   |       |
| Low family SES background             | Intercept                                                                                                                                                     | 4.002  | 0.743 |        | **   |       | 3.452  | 0.735 |        | **   |       |
|                                       | Length of trajectory in years                                                                                                                                 | 0.073  | 0.080 | 0.089  |      | 0.750 | -0.016 | 0.070 | -0.025 |      | 0.611 |
|                                       | Number of jobs                                                                                                                                                | 0.149  | 0.116 | 0.130  |      | 0.699 | 0.020  | 0.094 | 0.025  |      | 0.551 |
|                                       | Events of unemployment, short (<12 months) or long (>=12months), that total between 12 and 24 months (vs. never unemployed or unemployed less than 12 months) | -1.444 | 0.973 | -0.133 |      | 0.884 | -0.054 | 0.635 | -0.008 |      | 0.853 |
|                                       | Long events of unemployment (>=12 months) that total 24 months or more (vs. never unemployed or unemployed less than 12 months)                               | -1.328 | 1.411 | -0.081 |      | 0.944 | -1.517 | 0.584 | -0.257 | *    | 0.802 |
|                                       | Education: higher (vs. primary and secondary)                                                                                                                 |        |       |        |      |       | 1.933  | 0.627 | 0.319  | **   | 0.734 |
|                                       | Sex: male (vs. female)                                                                                                                                        |        |       |        |      |       | -0.150 | 0.483 | -0.030 |      | 0.869 |
|                                       | Origin: born abroad (vs. born in Spain)                                                                                                                       |        |       |        |      |       | -0.349 | 0.693 | -0.047 |      | 0.920 |
|                                       | R2                                                                                                                                                            |        | 0.141 |        | **   |       |        | 0.230 |        | **   |       |

Significance level: \*\*0.01 \*0.05

**Table A5: Odds Ratios and 95% Confidence Intervals (between brackets) of binary multilevel regression models showing whether spells of employment are occasions for acquiring further contacts, according to the mechanism used for obtaining jobs (N=250 interviewees, N=1734 events of employment).**

|                                       |                                                                     |       |                    |                    |
|---------------------------------------|---------------------------------------------------------------------|-------|--------------------|--------------------|
| Middle and high family SES background | Random effects:                                                     |       |                    |                    |
|                                       | Interviewee variance                                                | 0.472 | 0.333              | 0.362              |
|                                       | Fixed effects:                                                      |       |                    |                    |
|                                       | Intercept                                                           |       |                    |                    |
|                                       | Job-finding mechanism: employment contact (vs. family)              |       | 2.330(0.97-5.57)   | 2.282(0.94-5.54)   |
|                                       | Job-finding mechanism: educational contact (vs. family)             |       | 2.344(0.92-5.95)   | 2.353(0.90-6.17)   |
|                                       | Job-finding mechanism: contacts from other spheres (vs. family)     |       | 2.909(1.25-6.77)*  | 2.949(1.25-6.94)*  |
|                                       | Job-finding mechanism: old unknown contact (vs. family)             |       | 0.839(0.38-1.85)   | 0.805(0.36-1.81)   |
|                                       | Job-finding mechanism: formal mechanism (vs. family)                |       | 0.927(0.39-2.20)   | 0.908(0.37-2.21)   |
|                                       | Job-finding mechanism: self-application (vs. family)                |       | 1.100(0.49-2.45)   | 1.120(0.50-2.51)   |
|                                       | Interviewee sex: male (vs. female)                                  |       |                    | 1.110(0.67-1.85)   |
|                                       | Interviewee origin: born abroad (vs. born in Spain)                 |       |                    | 1.150(0.52-2.57)   |
|                                       | Interviewee age: 25-29 (vs. 20-24)                                  |       |                    | 1.041(0.59-1.82)   |
|                                       | Interviewee age: 30-34 (vs. 20-24)                                  |       |                    | 0.458(0.12-1.71)   |
|                                       | Interviewee education: higher (vs. primary and secondary education) |       |                    | 1.206(0.72-2.03)   |
|                                       | AIC                                                                 | 615.8 | 600.4              | 608.1              |
|                                       | BIC                                                                 | 625.2 | 637.7              | 668.7              |
|                                       | ICC                                                                 | 0.125 | 9.200              | 9.900              |
| Low family SES background             | Random effects:                                                     |       |                    |                    |
|                                       | Interviewee variance                                                | 0.359 | 0.165              | 0.000              |
|                                       | Fixed effects:                                                      |       |                    |                    |
|                                       | Intercept                                                           |       |                    |                    |
|                                       | Job-finding mechanism: employment contact (vs. family)              |       | 3.784(1.25-11.44)* | 3.825(1.29-11.38)* |
|                                       | Job-finding mechanism: educational contact (vs. family)             |       | 0.819(0.15-4.44)   | 0.663(0.12-3.60)   |
|                                       | Job-finding mechanism: contacts from other spheres (vs. family)     |       | 1.716(0.55-5.37)   | 1.618(0.52-5.07)   |
|                                       | Job-finding mechanism: old unknown contact (vs. family)             |       | 1.493(0.55-4.07)   | 1.296(0.48-3.49)   |
|                                       | Job-finding mechanism: formal mechanism (vs. family)                |       | 2.136(0.80-5.68)   | 2.024(0.76-5.39)   |
|                                       | Job-finding mechanism: self-application (vs. family)                |       | 1.099(0.35-3.43)   | 0.920(0.30-2.83)   |
|                                       | Interviewee sex: male (vs. female)                                  |       |                    | 0.583(0.33-1.03)   |
|                                       | Interviewee origin: born abroad (vs. born in Spain)                 |       |                    | 0.654(0.28-1.51)   |
|                                       | Interviewee age group: 25-29 (vs. 20-24)                            |       |                    | 0.883(0.48-1.62)   |
|                                       | Interviewee age group: 30-34 (vs. 20-24)                            |       |                    | 0.228(0.03-1.77)   |
|                                       | Interviewee education: higher (vs. primary and secondary education) |       |                    | 1.102(0.60-2.03)   |
|                                       | AIC                                                                 | 451.1 | 447.9              | 448.2              |
|                                       | BIC                                                                 | 459.8 | 482.7              | 504.6              |
|                                       | ICC                                                                 | 0.098 | 4.800              | 0.000              |

Significance level: \*\*0.01 \*0.05
